# Supplementary material for: Characterization of Danaparoid Complex Extractive Drug by an Orthogonal Analytical Approach
Source: PubMed Central journal article supplement (PMC6152146; doi:10.3390/molecules22071116), 2017-07-05
Supplement: molecules-22-01116-s001.pdf [file molecules-22-01116-s001.pdf]

# Supplementary material

## Characterization of Danaparoid complex extractive drug by an orthogonal analytical approach

Cristina Gardini <sup>1</sup>, Elena Urso <sup>2</sup>, Marco Guerrini <sup>2</sup>, René van Herpen <sup>3</sup>, Pauline de Wit <sup>3</sup> and Annamaria Naggi <sup>2,\*</sup>

<sup>1</sup> Centro Alta Tecnologia Istituto di Ricerche Chimiche e Biochimiche G. Ronzoni S.r.l., via G. Colombo 81, Milan, 20133, Italy; [gardini@cat-ronzoni.it](mailto:gardini@cat-ronzoni.it) (C.G.)

<sup>2</sup> Istituto di Ricerche Chimiche e Biochimiche G. Ronzoni S.r.l., via G. Colombo 81, Milan, 20133, Italy; [urso@ronzoni.it](mailto:urso@ronzoni.it) (E.U.); [guerrini@ronzoni.it](mailto:guerrini@ronzoni.it) (M.G.); [naggi@ronzoni.it](mailto:naggi@ronzoni.it) (A.N.)

<sup>3</sup> Aspen Oss B.V., Kloosterstraat 6, 5349 AB Oss, Netherlands; [rvanherpen@nl.aspenpharma.com](mailto:rvanherpen@nl.aspenpharma.com) (R.v.H.); [pdewit@nl.aspenpharma.com](mailto:pdewit@nl.aspenpharma.com) (P.d.W.)

\* Correspondence: [naggi@ronzoni.it](mailto:naggi@ronzoni.it); Tel.: +39 02 70641626

Contents:

Table S1: Abbreviations of assigned fragments.

Table S2: Results summary table regarding CS/DS fractions: assignment of main signals.

Table S3: Comparison of the main mass signals between Danaparoid CAT272 and its HS fraction.

Figure S1: <sup>1</sup>H NMR spectrum of Danaparoid samples: expansion of the acetyl region.

Figure S2: LC-MS chromatograms of a Danaparoid sample CAT277, the LC method was composed by an initial isocratic step followed by linear gradient: (a) Total Ion Chromatogram (TIC); (b) Base Peak Chromatogram (BPC).

Figure S3: LC-MS chromatograms: (a) repeatability of CAT277; (b) interday precision of CAT277; (c) interday precision of CAT271.

Figure S4: Acetyl region of proton spectra: comparison between (a) one Danaparoid sample CAT277; (b) its ChABC digestion product CAT469.

Figure S5: MS/MS spectrum of mass signal at m/z 466.0 (z -2) attributed to  $\Delta$ U4,2,2(T1) at the Collision Energy (CE) of 25 eV and the assignment of fragments.

Figure S6: MS/MS spectrum of mass signal at m/z 524.0 (z -2) attributed to  $\Delta$ U5,2,2(Ra) at the Collision Energy (CE) of 25 eV and the assignment of fragments.

Figure S7(a): Anomeric region of SEC fractions A-F of one Danaparoid sample (CAT272).

Figure S7(b): Anomeric region of SEC fractions G-N of one Danaparoid sample (CAT272).

**Table S1.** Abbreviations of assigned fragments.

| <b>Residue</b>                                                                                                                                            | <b>Abbreviation</b>      |
|-----------------------------------------------------------------------------------------------------------------------------------------------------------|--------------------------|
| H2/C2 N-sulfated glucosamine                                                                                                                              | ANS                      |
| H2/C2 3-O,N-sulfated glucosamine                                                                                                                          | A2*                      |
| H2/C2 N-acetyl glucosamine                                                                                                                                | ANAc                     |
| H6/C6 6-O-unsulfated glucosamine                                                                                                                          | A6OH                     |
| H6/C6 6-O-sulfated glucosamine                                                                                                                            | A6S                      |
| H1/C1 N-sulfated glucosamine <i>linked to</i> $\beta$ -D-glucuronic acid                                                                                  | ANS-(G)                  |
| H1/C1 3-O,N-sulfated glucosamine                                                                                                                          | A1*                      |
| H1/C1 N-sulfated glucosamine <i>linked to</i> 2-O-sulfo $\alpha$ -L-iduronic acid+ H1/C1 N-acetyl glucosamine <i>linked to</i> $\beta$ -D-glucuronic acid | Atot                     |
| H1/C1 N-sulfated glucosamine <i>linked to</i> $\alpha$ -L-iduronic acid                                                                                   | ANS-(I)                  |
| H1/C1 N-acetyl glucosamine <i>linked to</i> $\alpha$ -L-iduronic acid                                                                                     | ANAc-(Ix)                |
| H1/C1 reducing N-sulfated $\alpha$ -D-glucosamine + H1/C1 $\alpha$ -D-glucosamine                                                                         | ANSared+ANH <sub>2</sub> |
| H1/C1 reducing N-acetyl $\alpha$ -D- glucosamine                                                                                                          | ANAcared                 |
| H1/C1 reducing N-sulfated $\beta$ -D-glucosamine                                                                                                          | A $\beta$ red            |
| H1/C1 2-O-sulfo $\alpha$ -L-iduronic acid                                                                                                                 | I2S                      |
| H1/C1 $\alpha$ -L-iduronic acid <i>linked to</i> H6/C6 N sulfate /acetylated 6-O-sulfated $\alpha$ -D-glucosamine                                         | I-(A6S)                  |
| H1/C1 $\alpha$ -L-iduronic acid <i>linked to</i> H6/C6 of N sulfate /acetylated $\alpha$ -D-glucosamine                                                   | I-(A6OH)                 |
| H1/C1 $\beta$ -D-glucuronic acid <i>linked to</i> N-sulfated $\alpha$ -D-glucosamine                                                                      | G-(ANS)                  |
| H1/C1 $\beta$ -D-glucuronic acid <i>linked to</i> N-acetyl $\alpha$ -D-glucosamine                                                                        | G-(ANAc)                 |
| Oxidized N-acetylglucosamine                                                                                                                              | ANAc-ox                  |
| H1/C1 $\beta$ -D-glucuronic acid <i>linked to</i> 4-O-sulfo-N-acetylgalactosamine                                                                         | G-(GalNAc,4S)            |
| H1/C1 $\beta$ -D-glucuronic acid <i>linked to</i> 6-O-sulfo-N-acetylgalactosamine                                                                         | G-(GalNAc,6S)            |
| H1/C1 $\alpha$ -L-iduronic acid <i>linked to</i> $\beta$ -N-acetylgalactosamine                                                                           | I_DS                     |
| H1/C1 2-O-sulfo $\alpha$ -L-iduronic acid <i>linked to</i> $\beta$ -N-acetylgalactosamine                                                                 | I2S_DS                   |
| H2/C2 $\beta$ -N-acetylgalactosamine (DS+CS)                                                                                                              | GalNAc                   |
| H1/C1 $\alpha$ -L-iduronic acid <i>linked to</i> Oxidized N-acetylglucosamine                                                                             | I-(ANAc-ox)              |
| Oxidized N-acetyl galactosamine                                                                                                                           | GalNAc-ox                |
| Oxidized HS ox1                                                                                                                                           | ox1                      |
| Oxidized HS ox2                                                                                                                                           | ox2                      |
| Non reducing N- acetyl galactosamine                                                                                                                      | GalNAc_NR                |

**Table S2.** Results summary table regarding CS/DS fractions: assignment of main signals.

| Peak N. | Experimental m/z (z) | MW     | Assigned composition | Peak N. | Experimental m/z (z) | MW     | Assigned composition |
|---------|----------------------|--------|----------------------|---------|----------------------|--------|----------------------|
| 1       | 903.7(-2)            | 1809.4 | -                    | 14      | 1429.7(-3)           | 4292.1 | A16,8,8(Ra)          |
|         | 634.6(-2)            | 1271.2 | A6,2,3(Ra)           | 15      | 1587.1(-3)           | 4764.3 | A17,9,9(T1)          |
| 2       | 991.7(-2)            | 1985.4 | -                    | 16      | 1625.8(-3)           | 4880.4 | A18,9,9(Ra)          |
| 3       | 910.7(-2)            | 1823.4 | A7,4,4(T1)           | 17      | 1783.2(-3)           | 5352.6 | A19,10,10(T1)        |
| 4       | 968.7(-2)            | 1939.4 | A8,4,4(Ra)           | 18      | 1821.9(-3)           | 5468.7 | A20,10,10(Ra)        |
| 5       | 1056.7(-2)           | 2115.4 | -                    | 19      | 1451.9(-4)           | 5811.6 | A21,11,11(T1)        |
|         | 1285.8(-2)           | 2573.6 | -                    | 20      | 1448.7(-4)           | 5798.8 | A22,11,11(Ra)        |
| 6       | 1204.8(-2)           | 2411.6 | A9,5,5(T1)           | 21      | 1598.9(-4)           | 6399.6 | A23,12,12(T1)        |
| 7       | 1262.8(-2)           | 2527.6 | A10,5,5(Ra)          | 22      | 1628.2(-4)           | 6516.8 | A24,12,12(Ra)        |
| 8       | 1415.4(-2)           | 2832.8 | -                    | 23      | 1746.5(-4)           | 6990   | A25,13,13(T1)        |
| 9       | 1563.5(-2)           | 3129.0 | A11,6,6(T1)          | 24      | 1775.3(-4)           | 7105.2 | A26,13,13(Ra)        |
| 10      | 951.5(-3)            | 2857.5 | -                    | 25      | 1893.6(-4)           | 7578.4 | A27,14,14(T1)        |
| 11      | 1195.0(-3)           | 3588.0 | A13,7,7(T1)          | 26      | 1922.6(-4)           | 7694.4 | A28,14,14(Ra)        |
| 12      | 1233.7(-3)           | 3704.1 | A14,7,7(Ra)          | 27      | 2069.6(-4)           | 8282.4 | A30,15,15(Ra)        |
| 13      | 1304.9(-3)           | 3917.7 | -                    |         |                      |        |                      |

**Table S3.** Comparison of the main mass signals between Danaparoid CAT272 and its HS fraction.

| HS-Danaparoid |                  |                      | CAT272  |                  |                      |
|---------------|------------------|----------------------|---------|------------------|----------------------|
| Peak N.       | Experimental m/z | Assigned composition | Peak N. | Experimental m/z | Assigned composition |
| 1             | 568.6062         | A5,2,3*              | -       |                  |                      |
| 2             | 647.6176         | $\Delta$ U6,2,3*     | -       |                  |                      |
| 3             | 648.5645         | A5,4,3*              | -       |                  |                      |
| 4             | 695.5908         | $\Delta$ U6,3,3(T1)* | a       | 625.5269         | A5,5,0               |
| 5             | 727.5733         | $\Delta$ U6,4,3*     | -       |                  |                      |
| 6             | 713.6211         | $\Delta$ U7,2,3(Ra)* | b       | 505.0112         | U4,4,0               |
| 7             | 614.5498         | A5,4,1(T1)           | c       | 614.5497         | A5,4,1(T1)           |
| 8             | 702.5671         | U6,4,1(T1)           | d       | 702.5654         | U6,4,1(T1)           |
| 9             | 654.529          | A5,5,1(T1)           | e       | 654.5277         | A5,5,1(T1)           |
| 10            | 742.5434         | U6,5,1(T1)           | f       | 742.5419         | U6,5,1(T1)           |
| 11            | 967.6087         | A7,7,1(T1)           | g       | 967.6096         | A7,7,1(T1)           |
| 12            | 1055.6233        | U8,7,1(T1)           | h       | 1055.627         | U8,7,1(T1)           |
| 13            | 1072.1597        | A7,8,1(T1)           | i       | 1072.1602        | A7,8,1(T1)           |
| 14            | 1160.1763        | U8,8,1(T1)           | l       | 1160.1752        | U8,8,1(T1)           |
| 15            | 1176.7109        | A7,9,1(T1)           | m       | 1176.7131        | A7,9,1(T1)           |

\* These components could be CS/DS fragments not completely separated from the HS fraction.

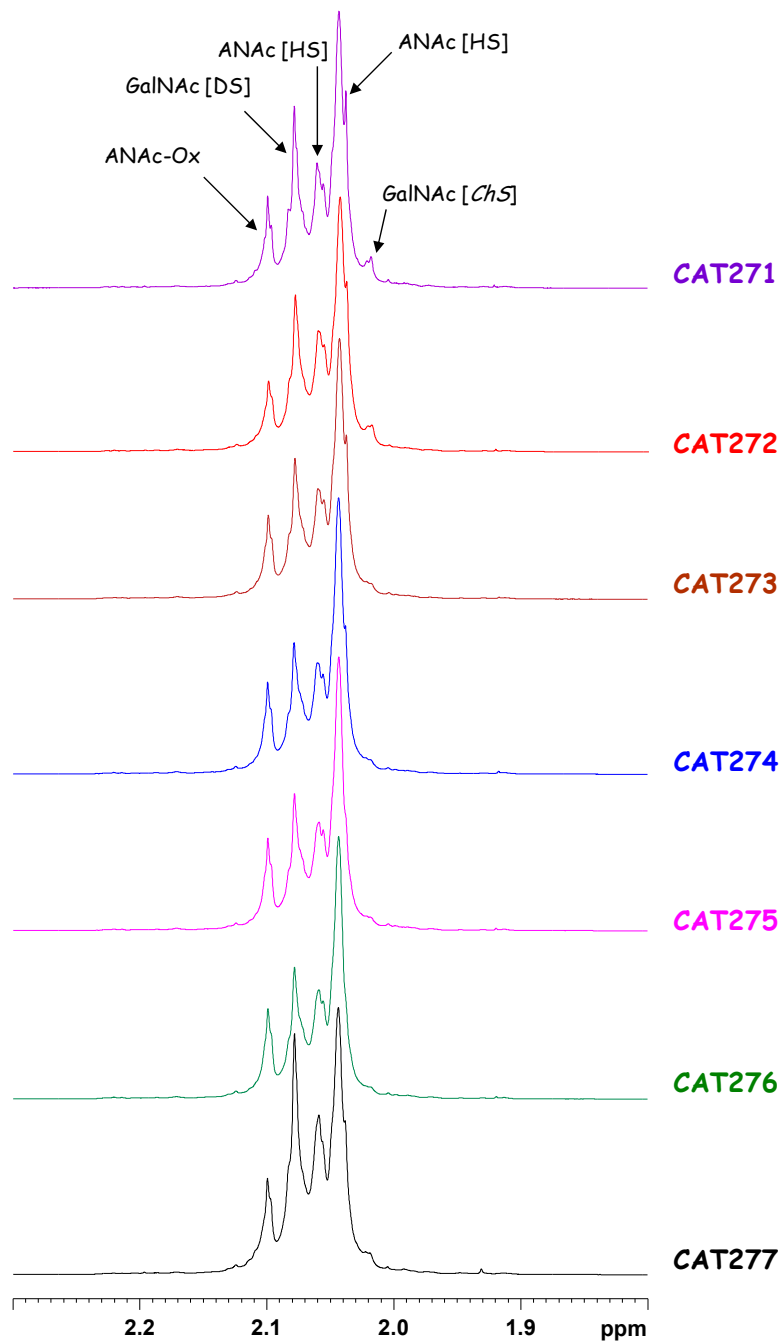

**Figure S1.** <sup>1</sup>H NMR spectrum of a Danaparoid samples: expansion of the acetyl region.

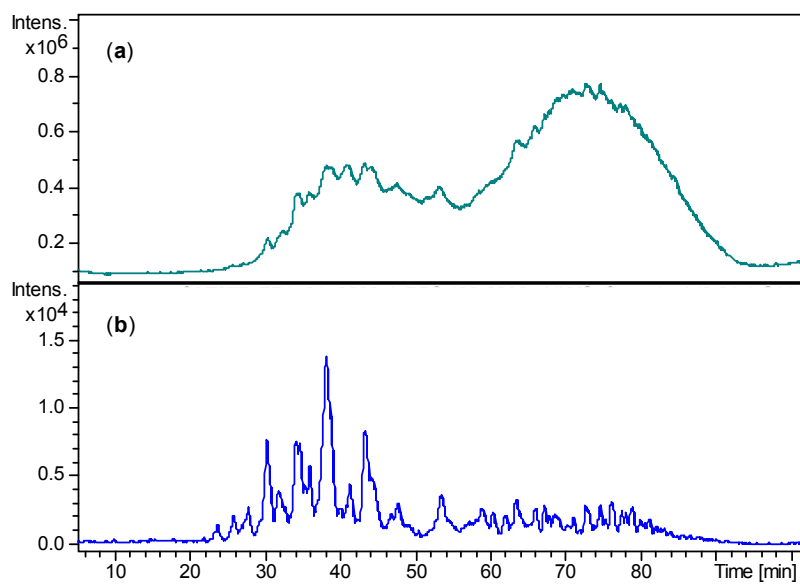

**Figure S2.** LC-MS chromatograms of a Danaparoid sample CAT277, the LC method was composed by an initial isocratic step followed by linear gradient: (a) Total Ion Chromatogram (TIC); (b) Base Peak Chromatogram (BPC).

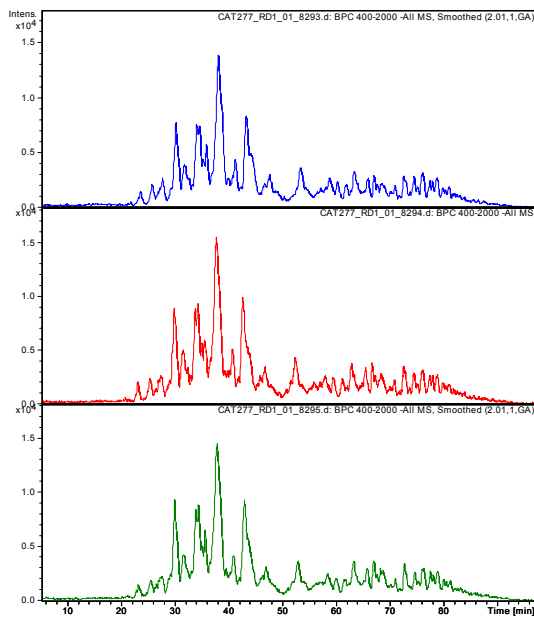

(a)

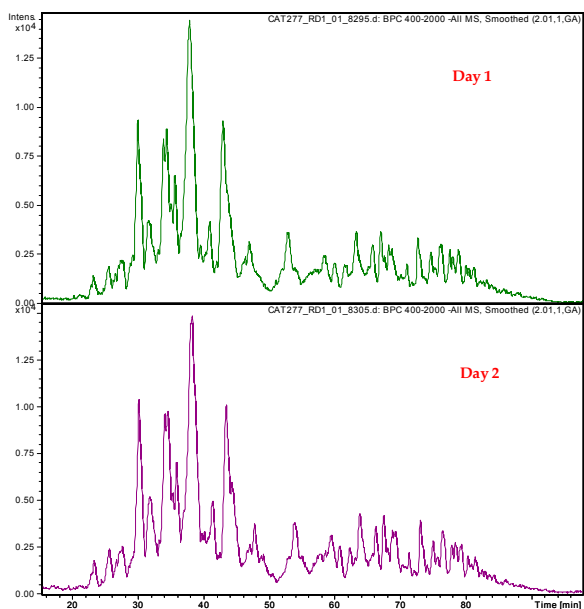

(b)

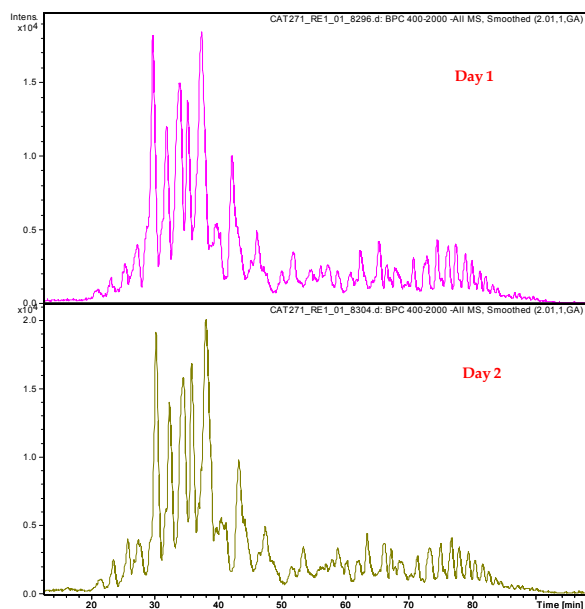

(c)

**Figure S3.** LC-MS chromatograms: (a) repeatability of CAT277; (b) interday precision of CAT277; (c) interday precision of CAT271.

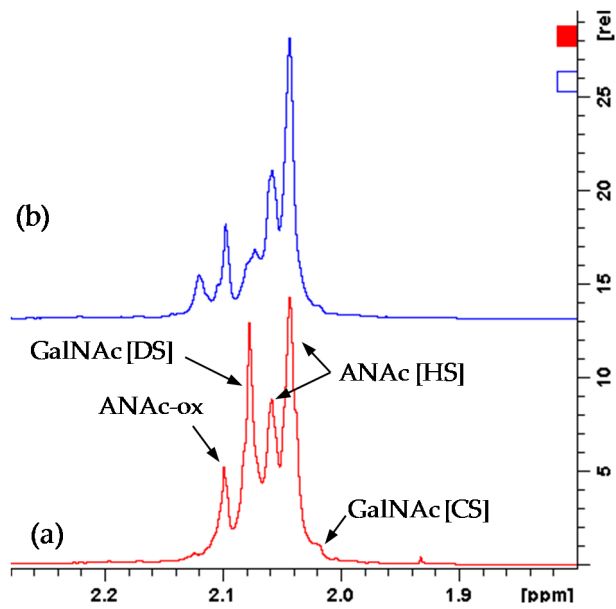

**Figure S4.** Acetyl region of proton spectra: comparison between (a) one Danaparoid sample CAT277; (b) its ChABC digestion product CAT469.

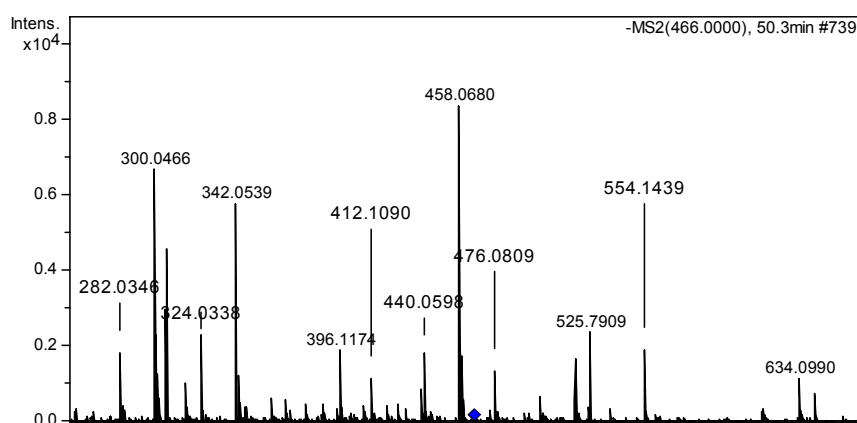

| m/z (-z)   | M   | Structure hypothesis               |
|------------|-----|------------------------------------|
| 466.0 (-2) | 934 | $\Delta U_{4,2,2}+O$               |
| 458.1 (-1) | 459 | $\Delta U_{2,1,1}$                 |
| 440.0 (-1) | 441 | $\Delta U_{2,1,1}(-H_2O)$          |
| 412.1 (-1) | 413 | $U-A_{NAc}+O$                      |
| 396.1 (-1) | 397 | $U-A_{NAc}$                        |
| 342.1 (-1) | 343 | <p>where R = SO<sub>3</sub>, H</p> |
| 316.0 (-1) | 317 | $A_{NAc,S}+O$                      |
| 300.0 (-1) | 301 | $A_{NAc,S}$                        |
| 282.0 (-1) | 283 | $A_{NAc,S}(-H_2O)$                 |
| 554.1 (-1) | 555 | $\Delta U-A_{NAc}-U$               |
| 634.1 (-1) | 635 | $\Delta U-A_{NAc}-U(+SO_3)$        |

**Figure S5.** MS/MS spectrum of mass signal at m/z 466.0 (z -2) attributed to  $\Delta U_{4,2,2}(T1)$  at the Collision Energy (CE) of 25 eV and the assignment of fragments.



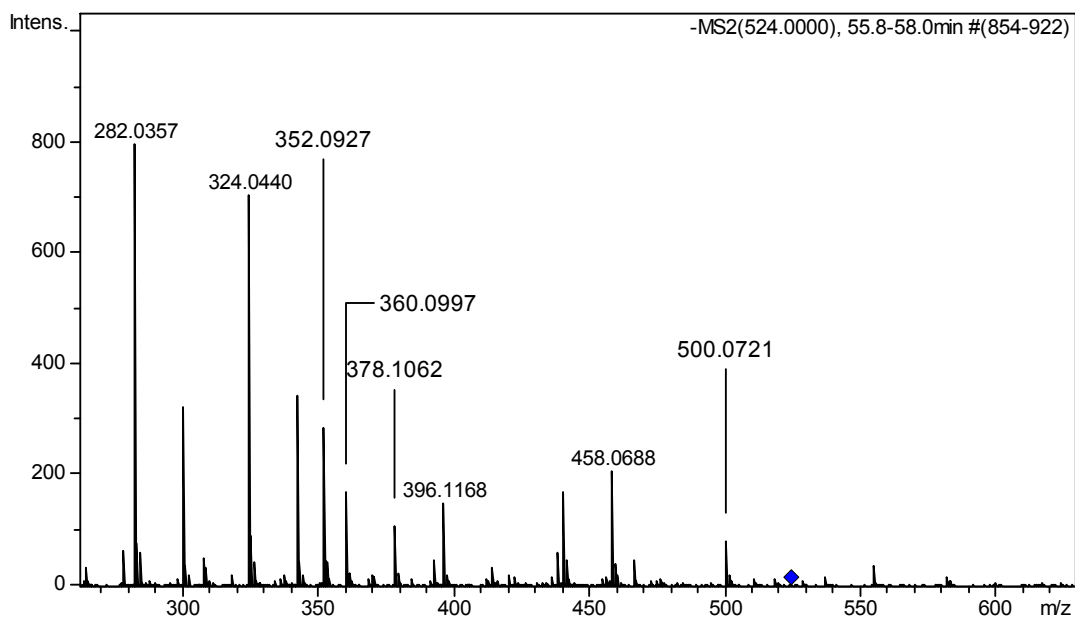

| m/z (-z)   | M    | Structure hypothesis                                          |
|------------|------|---------------------------------------------------------------|
| 524.0 (-2) | 1050 | $\Delta U_{4,2,2} (+C_4H_4O_5)$                               |
| 500.1 (-1) | 501  | -                                                             |
| 458.1 (-1) | 459  | $\Delta U_{2,1,1}$                                            |
| 440.0 (-1) | 441  | $\Delta U_{2,1,1} (-H_2O)$                                    |
| 396.1 (-1) | 397  | U-ANAc                                                        |
| 378.1 (-1) | 379  | $\Delta U$ -ANAc                                              |
| 360.1 (-1) | 361  | $\Delta U$ -ANAc (-H <sub>2</sub> O)                          |
| 352.1 (-1) | 353  | ANAc (+C <sub>4</sub> H <sub>4</sub> O <sub>5</sub> )         |
| 342.1 (-1) | 343  | <p style="text-align: right;">where R = SO<sub>3</sub>, H</p> |
| 324.1 (-1) | 325  | -                                                             |
| 536.1 (-1) | 537  | $\Delta U$ -ANAc-U (-H <sub>2</sub> O)                        |
| 554.1 (-1) | 555  | $\Delta U$ -ANAc-U                                            |

**Figure S6.** MS/MS spectrum of mass signal at m/z 524.0 (z -2) attributed to  $\Delta U_{5,2,2}$ (Ra) at the Collision Energy (CE) of 25 eV and the assignment of fragments.

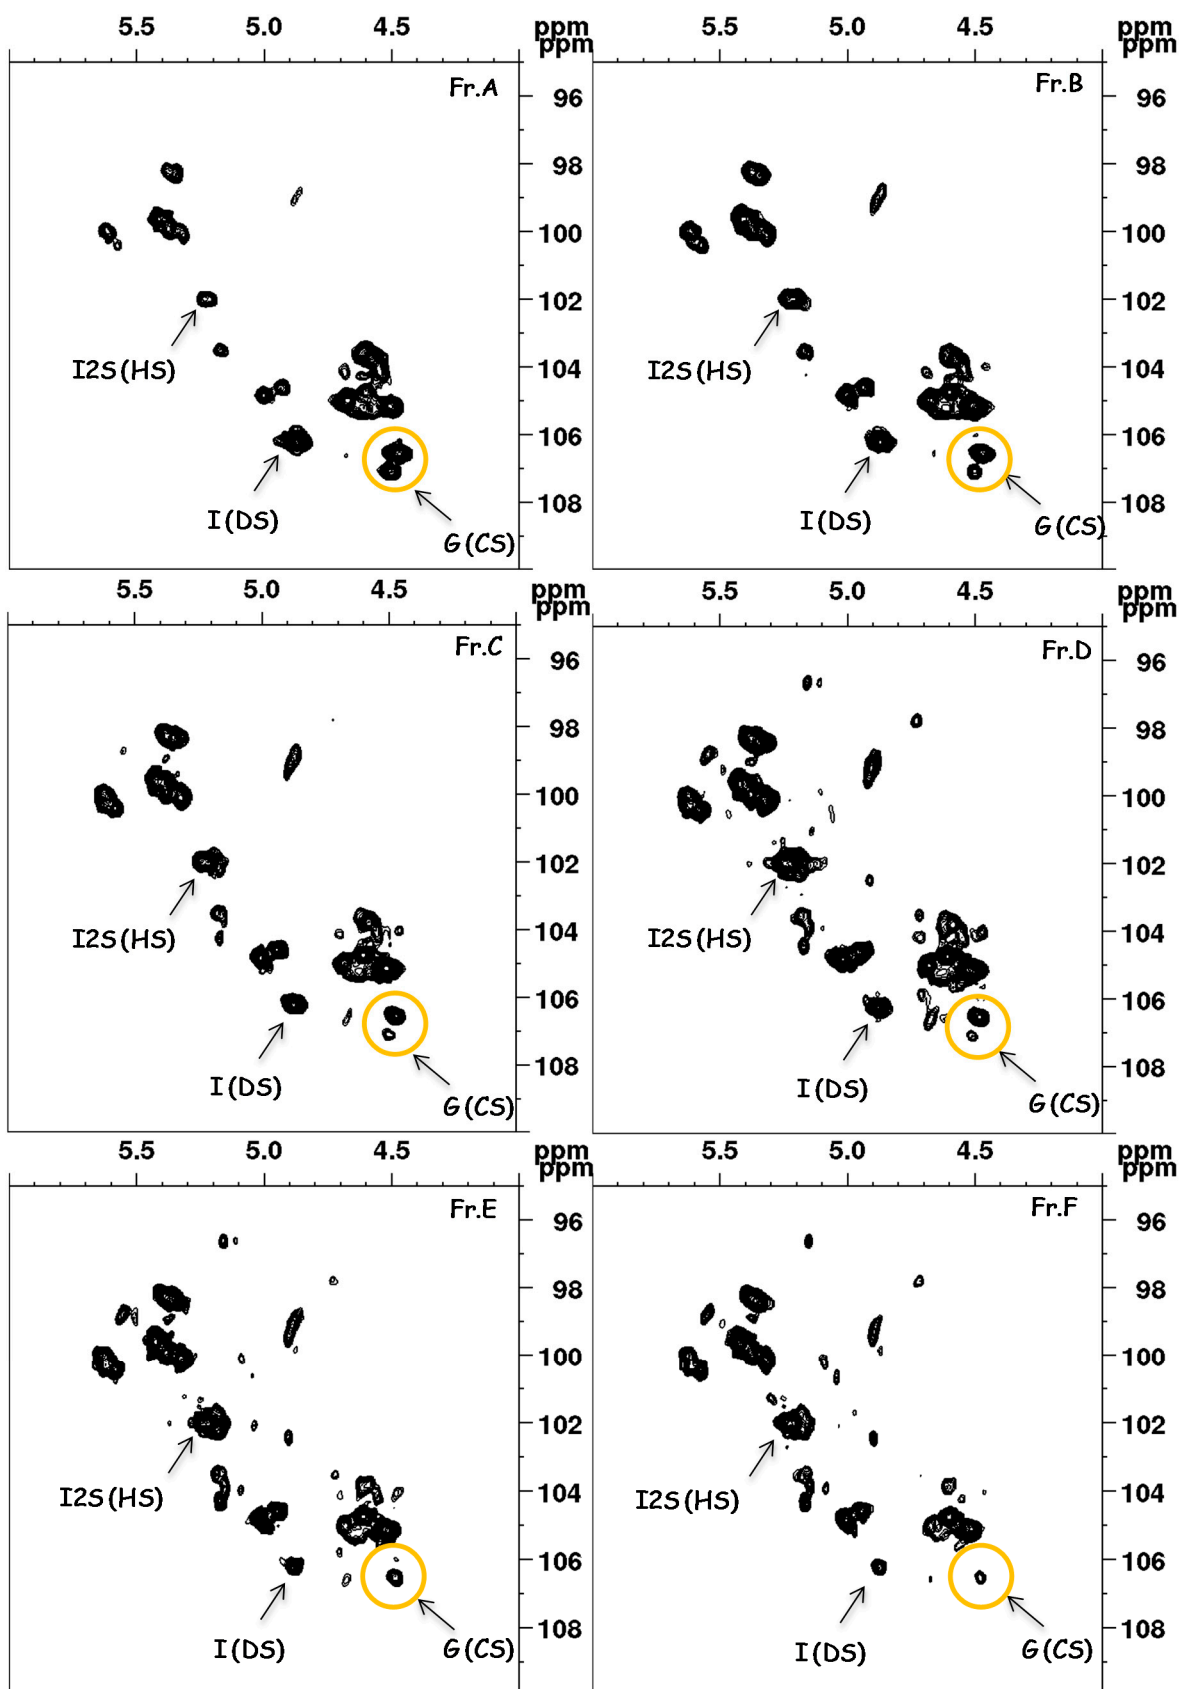

**Figure S7(a).** Anomeric region of SEC fractions A-F of one Danaparoid sample (CAT272).

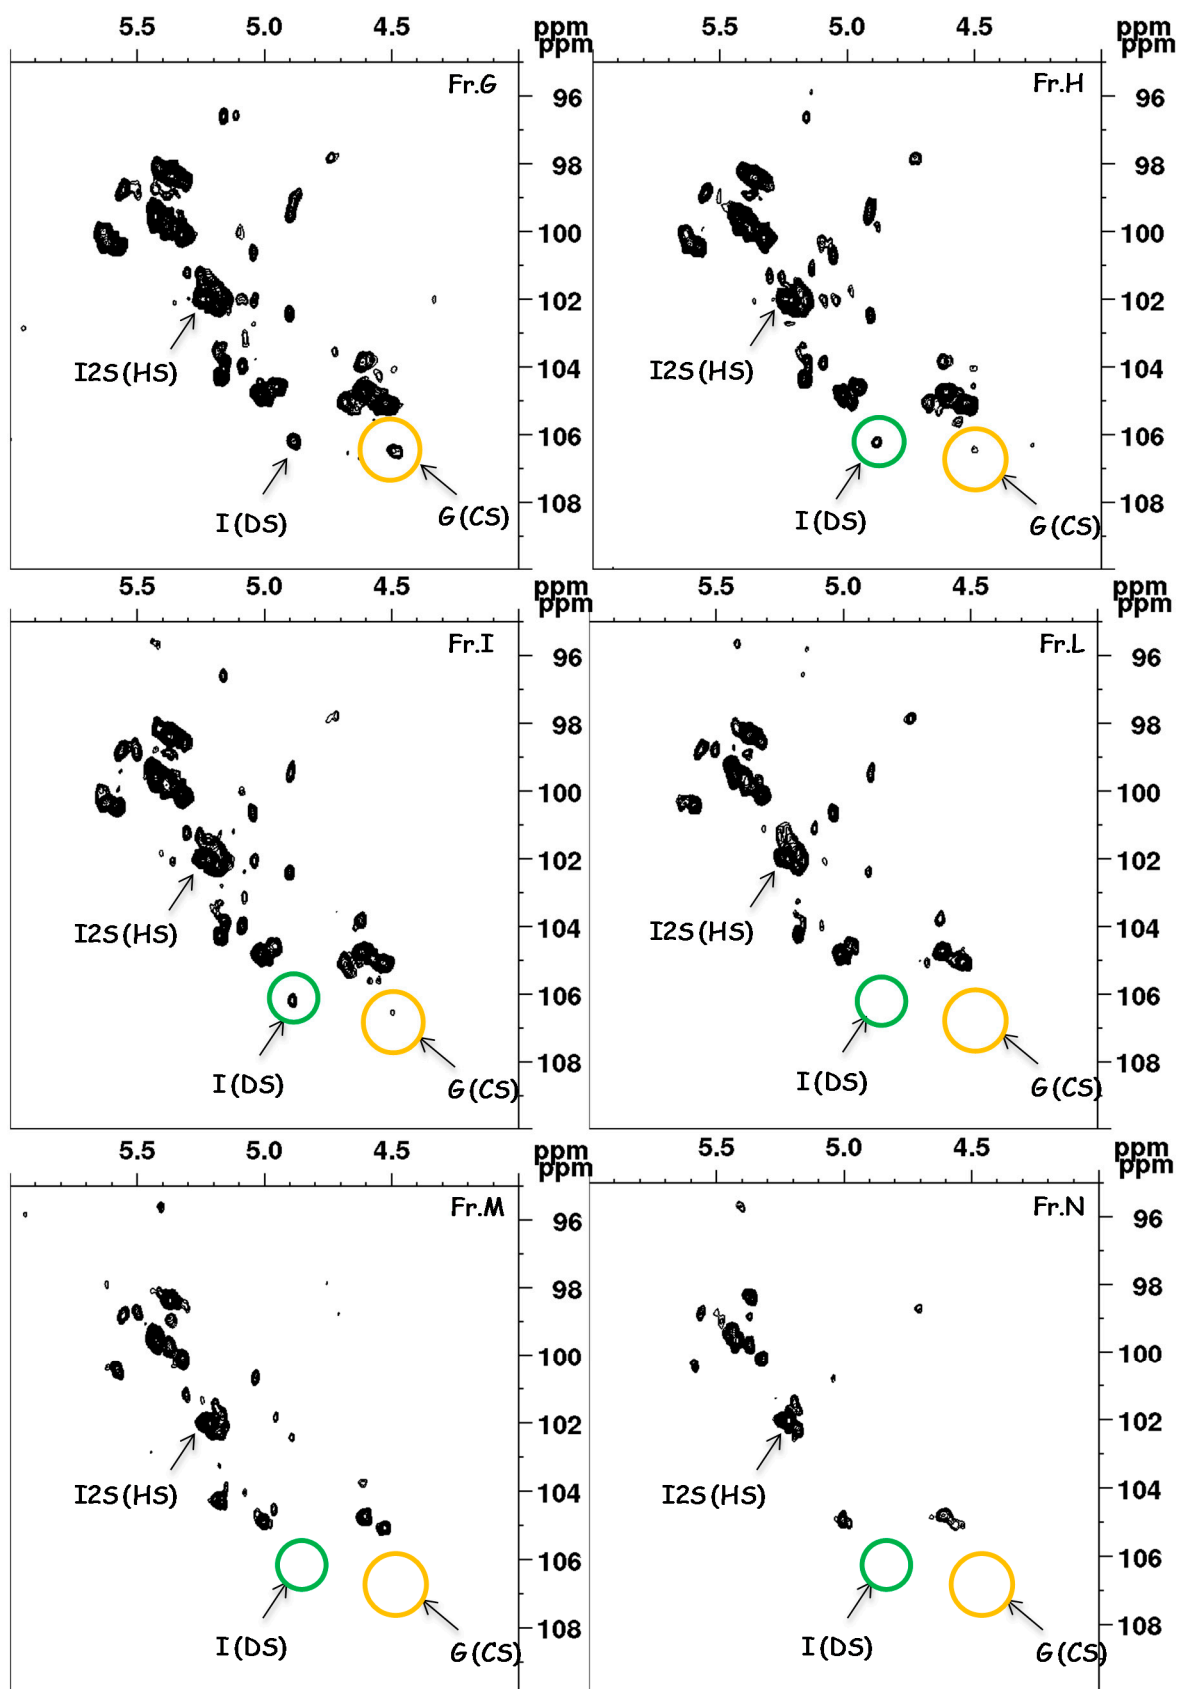

**Figure S7(b).** Anomeric region of SEC fractions G-N of one Danaparoid sample (CAT272).
